# Supplementary material for: When to vaccinate for seasonal influenza? Check the peak forecast
Source: Research Square preprint supplement (doi:10.21203/rs.3.rs-4893237/v1), 2024-09-09
Supplement: Supplementary file 2 [file 2b87a02740eee625e16d94fa.pdf]

## 1           Additional File 2: Individual age group 2    histograms of favorable vaccination schedule shifts

3   Additional File 2 contains individual age group histograms of favorable vaccination  
4   schedule shifts compared to historic uptake, under six different initial VE and waning  
5   scenarios. Data points are states/seasons. On the x-axes, zero indicates the starting  
6   historic vaccination uptake week for each state and season. Negative numbers indicate  
7   early vaccination in weeks; positive numbers indicate delayed vaccination in weeks.  
8   The y-axes show the proportion of occurrences of a particular schedule shift for all  
9   states and seasons in our data set. Figure 1 shows age group 0-4, Figure 2 shows age  
10   group 5-24, Figure 3 shows age group 25-49, Figure 4 shows age group 50-64, and  
11   Figure 5 shows age group 65 and over.

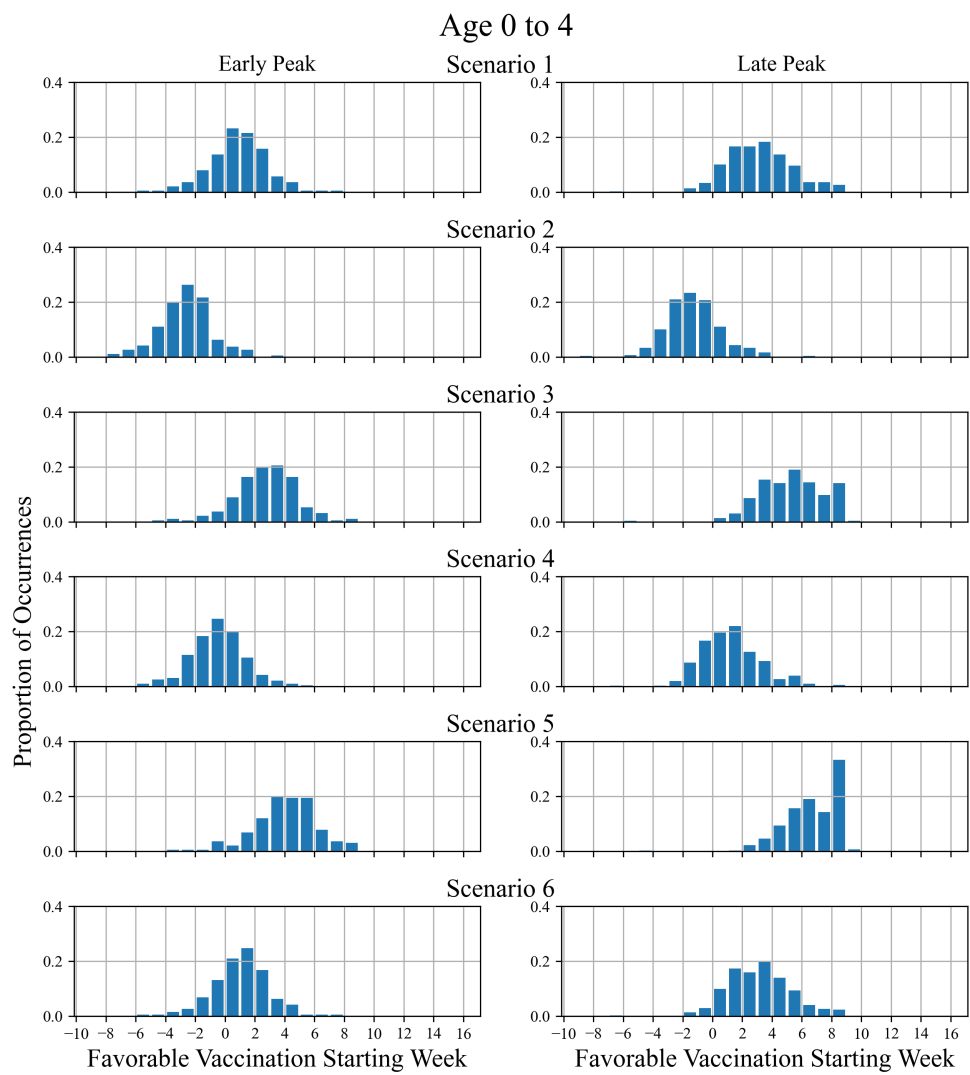

Fig. 1

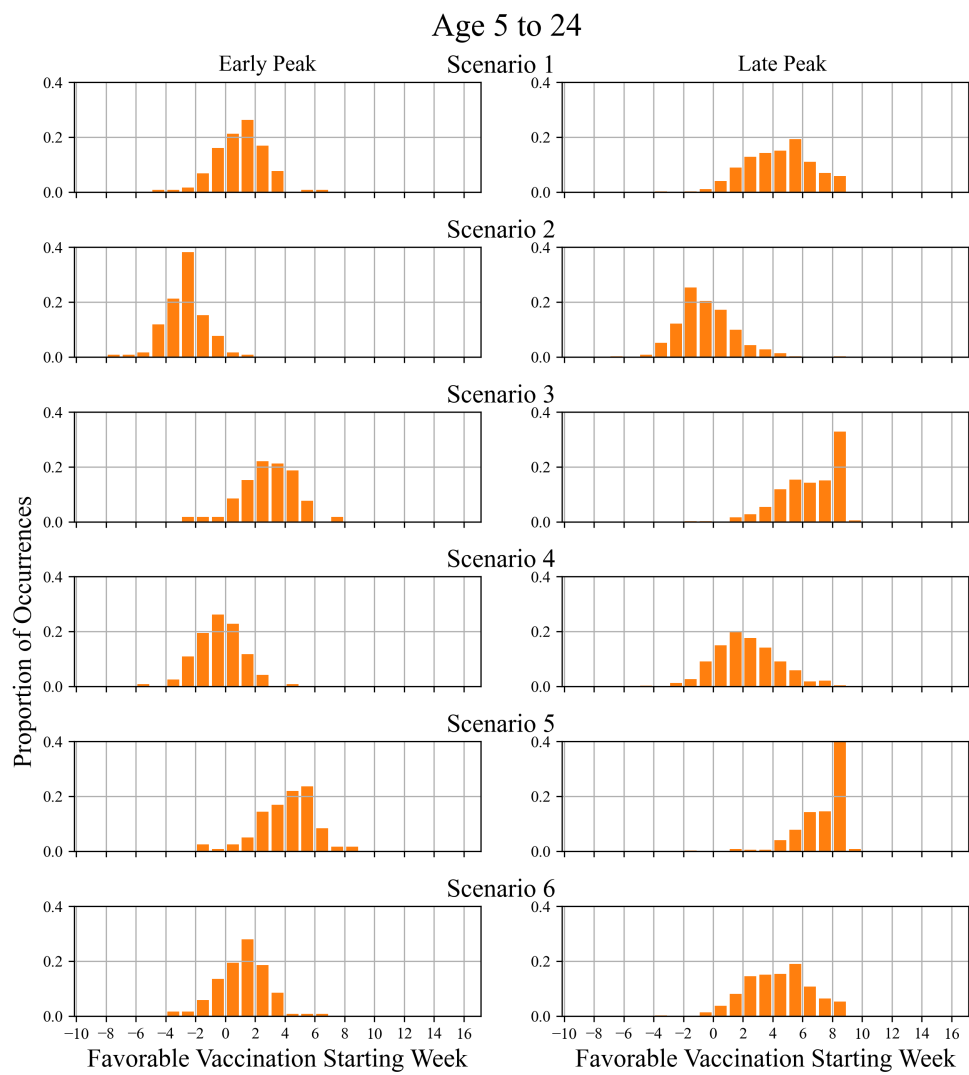

**Fig. 2**

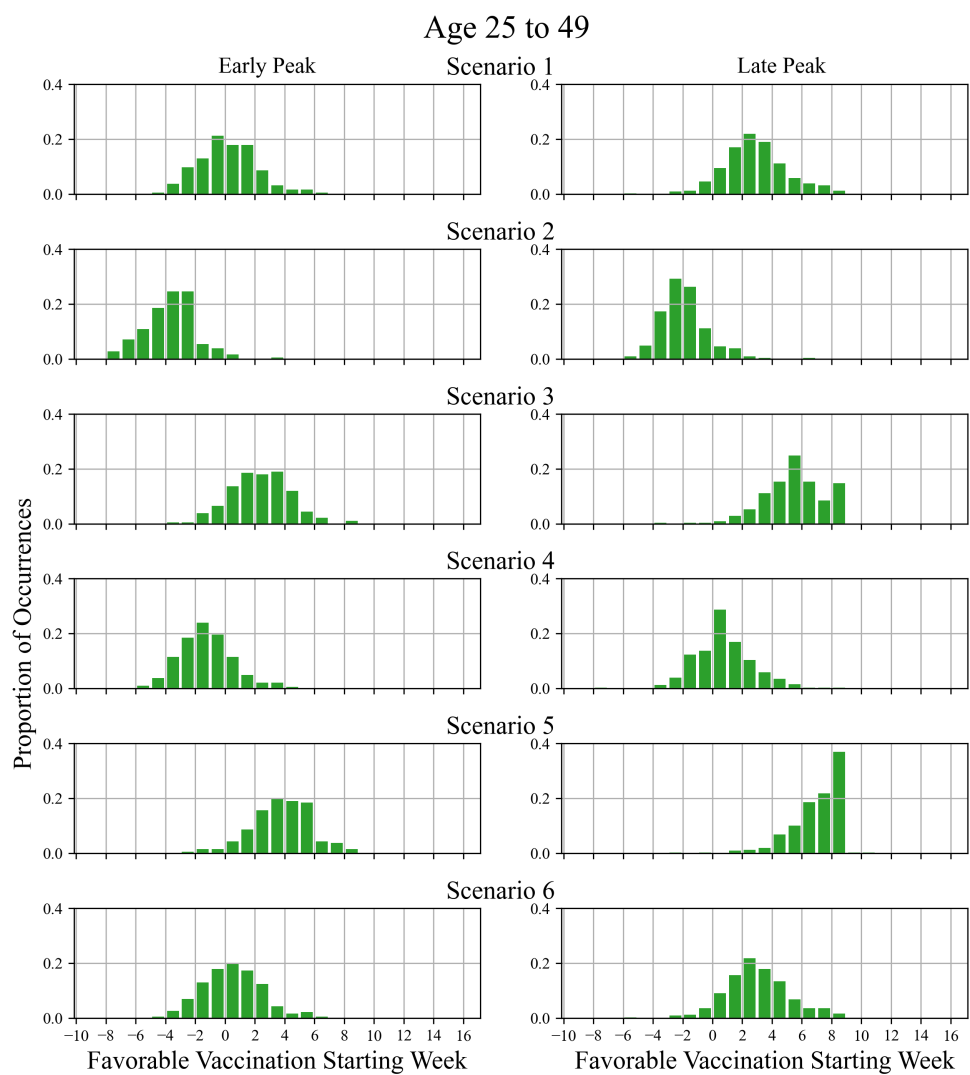

**Fig. 3**

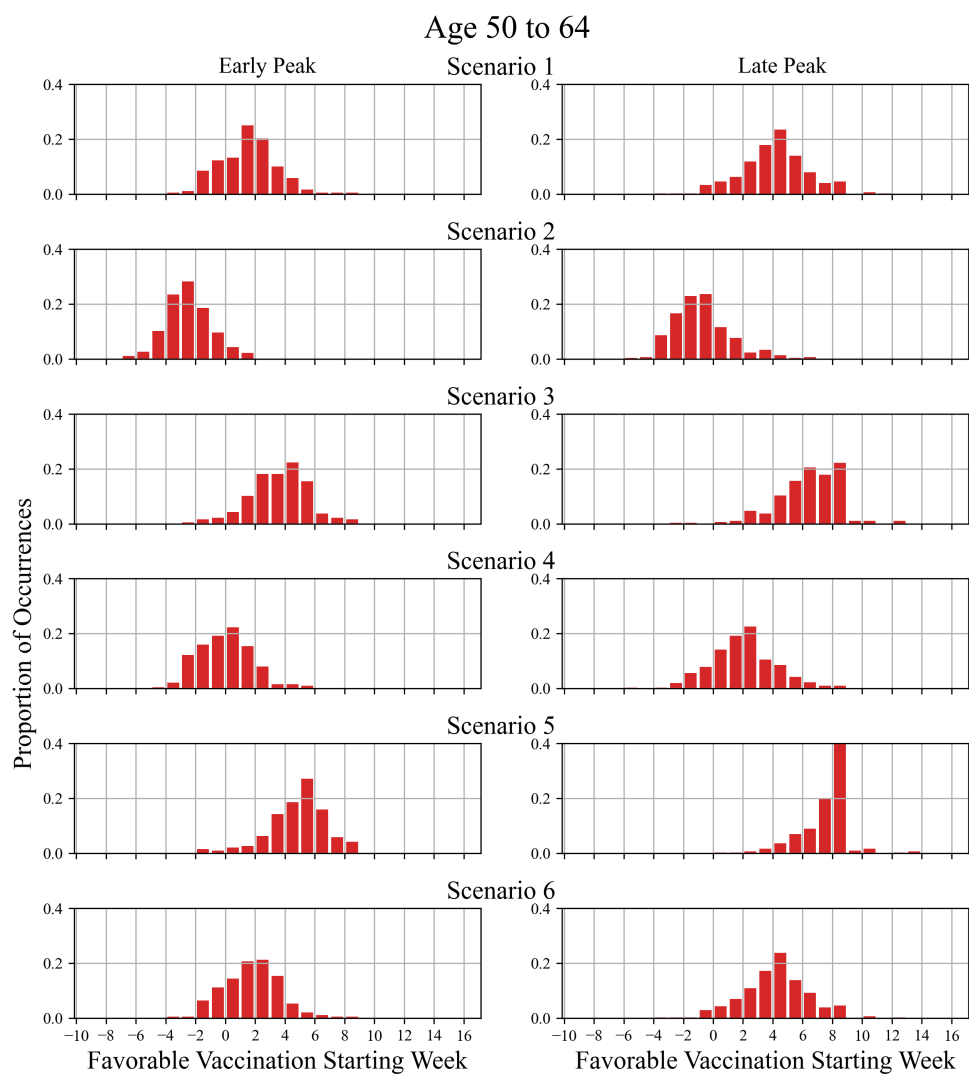

Fig. 4

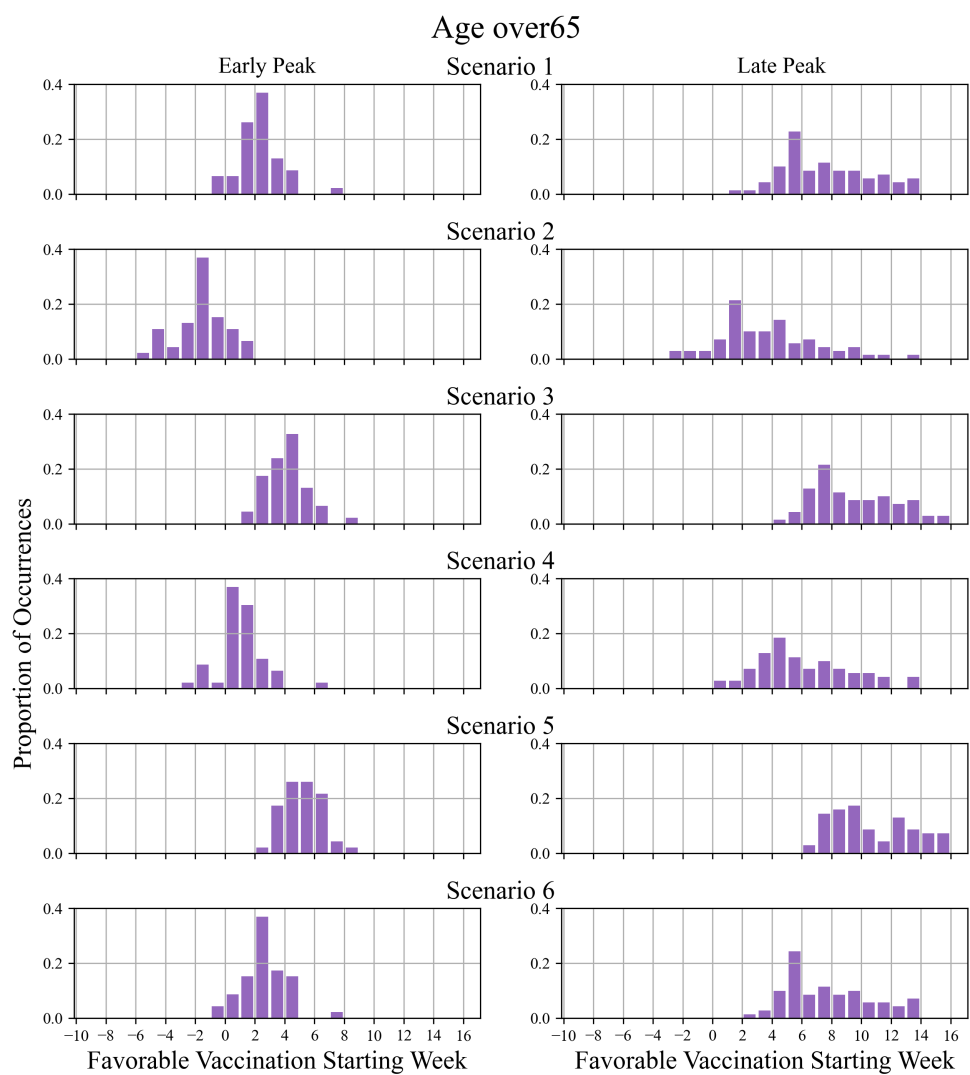

**Fig. 5**
